# Supplementary material for: Effects of ambient air pollution on emergency room visits of children for acute respiratory symptoms
Source: bioRxiv or medRxiv preprint supplement (doi:10.1101/2020.11.17.20223701), 2020-11-19
Supplement: Supplementary file [file media-1.pdf]

**Table1: Percentage change in daily emergency visits of children per 10-unit increase of pollutants at different lag days in single-pollutant model**

| Total daily number of children                           | Lag days | PM <sub>10</sub> (µg/m <sup>3</sup> ) | PM <sub>2.5</sub> (µg/m <sup>3</sup> ) | NO <sub>2</sub> (µg/m <sup>3</sup> ) | O <sub>3</sub> (µg/m <sup>3</sup> ) | CO (mg/m <sup>3</sup> )  | SO <sub>2</sub> (µg/m <sup>3</sup> ) |
|----------------------------------------------------------|----------|---------------------------------------|----------------------------------------|--------------------------------------|-------------------------------------|--------------------------|--------------------------------------|
| Attended emergency room                                  | 0        | 0.18<br>(0.12, 0.25)                  | 0.15<br>(0.02, 0.28)                   | 0.46<br>(0.05, 0.87)                 |                                     |                          | 5.11<br>(3.73, 6.51)                 |
|                                                          | 1        | -                                     | -                                      | -                                    |                                     |                          |                                      |
|                                                          | 2        | -                                     | -                                      | -                                    |                                     | 13.19<br>(0.10, 27.99)   |                                      |
|                                                          | 3        | -0.16<br>(-0.23, -0.09)               | -0.24<br>(-0.37, -0.11)                |                                      | -0.65<br>(-1.11, 0.19)              |                          | -1.66<br>(-2.91, -0.40)              |
| Visited emergency room having acute respiratory symptoms | 0        | 0.33<br>(0.16, 0.51)                  | -                                      |                                      |                                     |                          | 10.45<br>(6.84, 14.18)               |
|                                                          | 1        | -                                     | -                                      | 1.31<br>(0.12, 2.51)                 |                                     |                          |                                      |
|                                                          | 2        | -                                     | -                                      |                                      |                                     |                          |                                      |
|                                                          | 3        | -0.28<br>(-0.46, -0.1)                | -                                      |                                      | -1.89<br>(-3.11, -0.65)             | 29.59<br>(0.84, 66.54)   |                                      |
| Visited emergency room having cough                      | 0        | 0.32<br>(0.14, 0.50)                  | -                                      |                                      |                                     |                          | 9.08<br>(5.46, 12.82)                |
|                                                          | 1        | -                                     | -                                      | 1.9<br>(0.7, 3.11)                   |                                     | 47.03<br>(8.28, 99.65)   |                                      |
|                                                          | 2        | -                                     | -                                      |                                      | -2.05<br>(-3.48, -0.61)             |                          |                                      |
|                                                          | 3        | -0.36<br>(-0.54, -0.18)               | -                                      |                                      | -2.11<br>(-3.36, -0.86)             |                          |                                      |
| Visited emergency room having noisy breathing            | 0        | 0.26<br>(0.03, 0.48)                  | -                                      |                                      |                                     |                          |                                      |
|                                                          | 1        | -                                     | -                                      |                                      |                                     |                          | 6.9<br>(1.77, 12.28)                 |
|                                                          | 2        | 0.28<br>(-0.01, 0.56)                 | -                                      |                                      |                                     |                          |                                      |
|                                                          | 3        | -0.49<br>(-0.72, -0.26)               | -0.56<br>(-0.98, -0.14)                | -2.38<br>(-3.63, -1.12)              | -4.4<br>(-6.0, -2.78)               |                          | -5.04<br>(-9.09, -0.82)              |
| Visited emergency room having difficulty in breathing    | 0        | 0.47<br>(0.28, 0.66)                  | 0.54<br>(0.19, 0.89)                   |                                      |                                     |                          | 7.75<br>(3.89, 11.75)                |
|                                                          | 1        | -                                     | -                                      | 2.33<br>(1.08, 3.60)                 |                                     | 47.45<br>(6.59, 103.96)  | 5.53<br>(1.34, 9.90)                 |
|                                                          | 2        | -                                     | -                                      |                                      |                                     |                          |                                      |
|                                                          | 3        | -0.34<br>(-0.53, -0.15)               | -0.43<br>(-0.79, -0.07)                |                                      | -3.39<br>(-4.73, -2.03)             |                          |                                      |
| Visited emergency room having nasal symptoms             | 0        | 0.43<br>(0.25, 0.62)                  | 0.39<br>(0.04, 0.75)                   |                                      | -1.48<br>(-2.83, -0.11)             |                          | 6.54<br>(2.63, 10.60)                |
|                                                          | 1        | -                                     | -                                      | 2.28<br>(1.01, 3.56)                 |                                     | 62.01<br>(16.59, 125.13) | 4.3<br>(0.07, 8.72)                  |
|                                                          | 2        | -                                     | -                                      |                                      | -2.04<br>(3.65, -0.41)              |                          |                                      |
|                                                          | 3        | -0.41<br>(-0.6, -0.21)                | -0.45<br>(-0.82, -0.09)                |                                      | -3.86<br>(-5.24, -2.46)             |                          |                                      |

Data expressed as percentage change (95% Confidence Interval). Statistically significant results p<0.05 are presented.

\*Highest percentage change in emergency visits of children after accounting for the average daily temperature, relative humidity, days of the week and public holidays.

Abbreviations: PM-particulate matter, NO<sub>2</sub>-nitrogen dioxide, O<sub>3</sub>-ozone, CO-carbon monoxide, SO<sub>2</sub>-sulfur dioxide,.
